# Supplementary material for: The gut microbiome in atherosclerotic cardiovascular disease
Source: Nat Commun. 2017 Oct 10;8:845. doi: 10.1038/s41467-017-00900-1 (PMC5635030; doi:10.1038/s41467-017-00900-1)
Supplement: Supplementary file 1 — Supplementary Information [file 41467_2017_900_MOESM1_ESM.pdf]

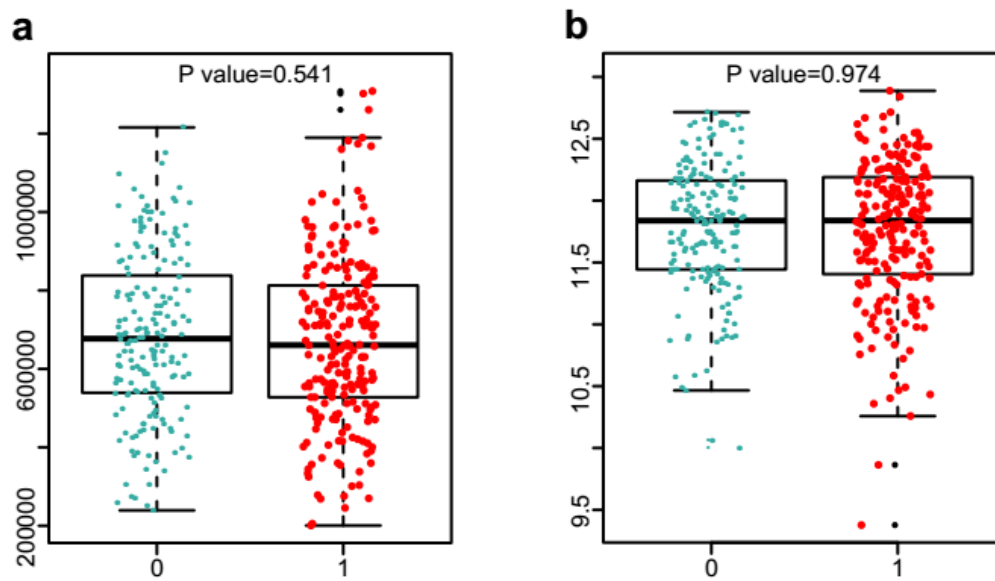

**Supplementary Figure 1. Diversity and richness of the ACVD gut microbiome.**  
**(a)** Gene richness of the ACVD patients (n= 218, red) compared to the control groups (n=187, cyan). p-values from Wilcoxon rank-sum test are shown. **(b)**  $\alpha$ -diversity (Shannon index) of the ACVD patients (n= 218, red) and control groups (n=187, cyan). Wilcoxon rank-sum test.



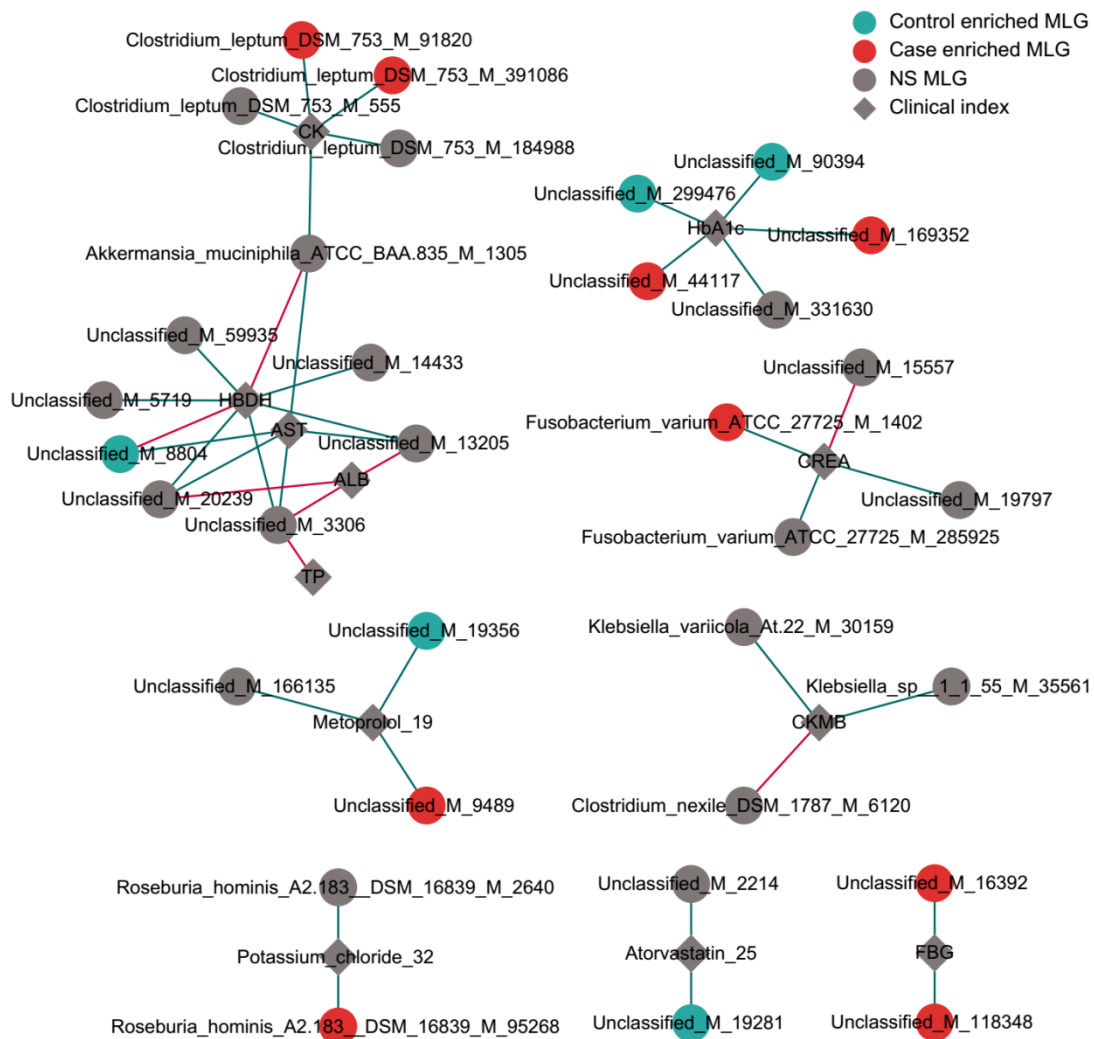

### Supplementary Figure 3. MLGs influenced by drugs or clinical indices.

Associations in ACVD patients identified by MaAsLin. Green edges, positive associations; red edges, negative associations. Red circles, ACVD-enriched; cyan circles, control-enriched; grey circles, no significant difference.  $q$ -value  $< 0.05$  between 187 healthy controls and 218 ACVD cases, FDR controlled Wilcoxon rank-sum test.

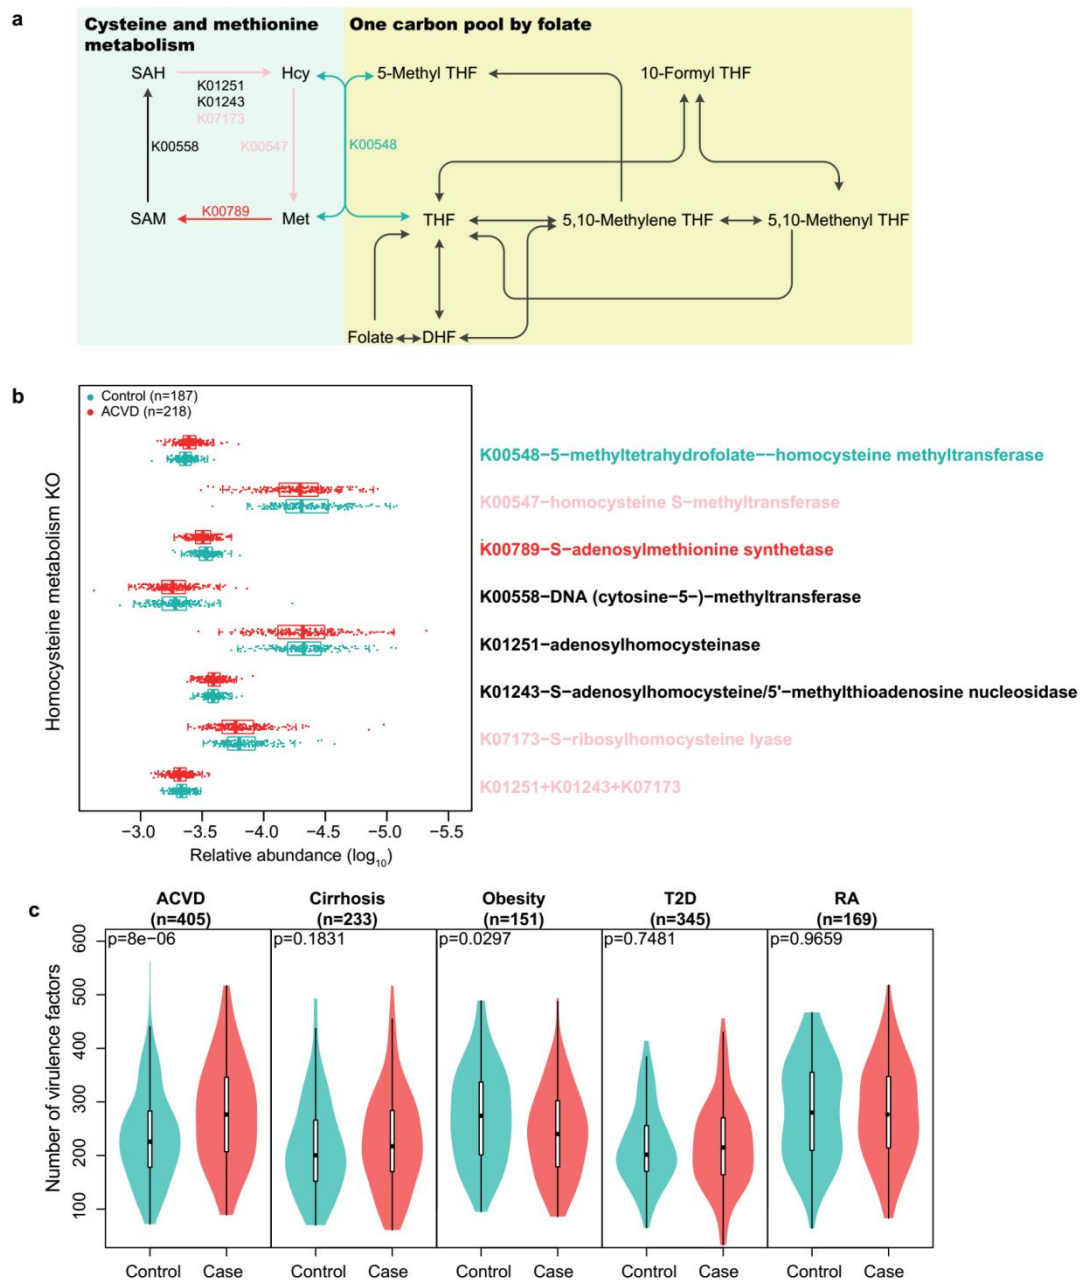

**Supplementary Figure 4. Homocysteine metabolism and virulence factors.**

**(a)** Pathways for homocysteine and folate metabolism. **(b)** Relative abundances of the KOs involved in homocysteine metabolism. The KOs were colored according to significant differences between the ACVD samples ( $n=218$ ) and control samples ( $n=187$ ), i.e. red or cyan,  $p$ -value  $< 0.01$ ; light red or green,  $p$ -value  $< 0.05$ ; black,  $p$ -value  $\geq 0.05$ , Wilcoxon rank-sum test. **(c)** Number of virulence factors in the cohorts. Counted in each sample according to VFDB,  $p$ -values from Wilcoxon rank-sum tests. Among these, RA was the only cohort from northern China, and obesity was the only young adult cohort.

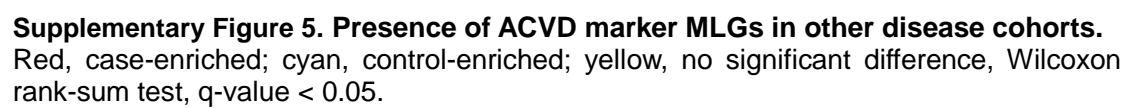

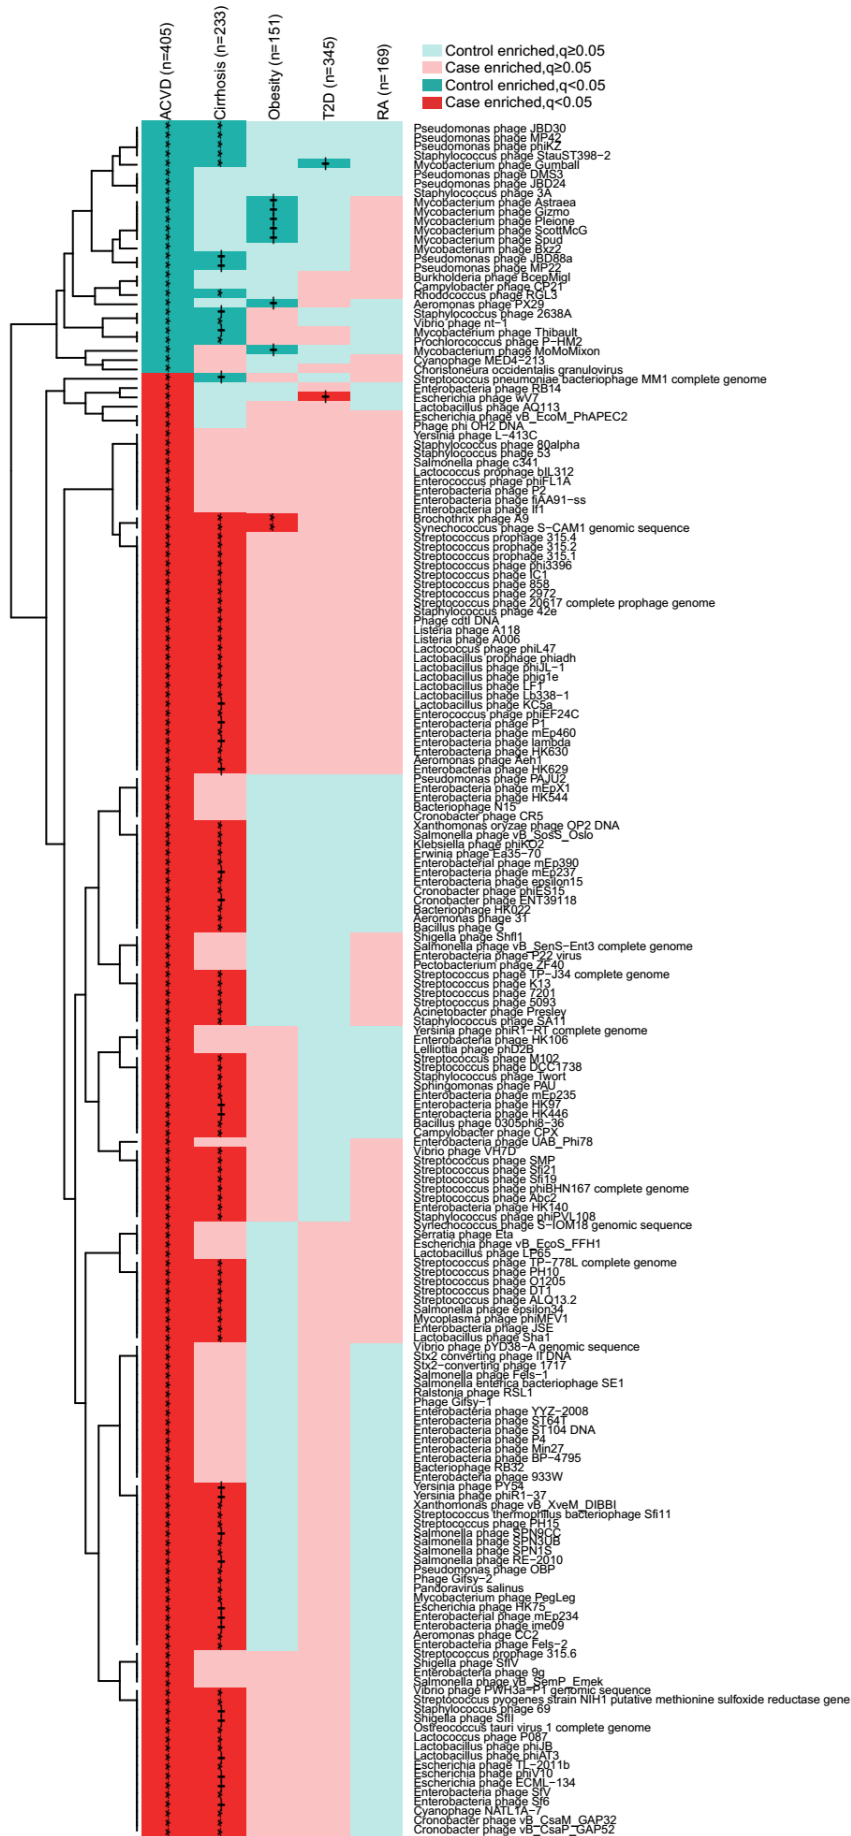

**Supplementary Figure 6. Bacteriophages in the gut microbiome of ACVD and other diseases.**

Differentially enriched phages in the disease cohorts. Red, case-enriched; green, control-enriched. +, q-value < 0.05; \*, q-value < 0.01, FDR controlled Wilcoxon rank-sum test.



Spearman's correlation was performed between the relative abundances of phages and MLGs. Blue, negative correlation; red, positive correlation. The heatmap was hierarchically clustered on both axes. Red, case-enriched; green, contro-enriched; grey, no significant difference, p-value  $\geq 0.05$ . Wilcoxon rank-sum test.



**Supplementary Table 1. PERMANOVA for the influence of ACVD on gut microbial gene abundance, without (upper) and with (lower) adjustment for medication.** Bray-Curtis distance, 99999 permutations.

| Non adjustment                                    |     |           |         |         |       |         |
|---------------------------------------------------|-----|-----------|---------|---------|-------|---------|
|                                                   | Df  | SumsOfSqs | MeanSqs | F.Model | R2    | P value |
| CHD                                               | 1   | 2.902     | 2.902   | 20.182  | 0.048 | 0.000   |
| Residuals                                         | 403 | 57.944    | 0.144   |         | 0.952 |         |
| Total                                             | 404 | 60.845    |         |         | 1.000 |         |
| Adjust drug effect permanova                      |     |           |         |         |       |         |
| Drug<br>(Drug ID_number of samples with the drug) | Df  | SumsOfSqs | MeanSqs | F.Model | R2    | P value |
| Clopidogrel.Hydrogen.Sulphate.Tablets_117         | 1   | 0.836     | 0.836   | 6.277   | 0.017 | 0.000   |
| Aspirin_33                                        | 1   | 0.209     | 0.209   | 1.573   | 0.004 | 0.137   |
| Atorvastatin_25                                   | 1   | 0.355     | 0.355   | 2.667   | 0.007 | 0.021   |
| Esomeprazole_9                                    | 1   | 0.050     | 0.050   | 0.379   | 0.001 | 0.926   |
| Isosorbide.Mononitrate_11                         | 1   | 0.167     | 0.167   | 1.257   | 0.003 | 0.246   |
| Perindopril_15                                    | 1   | 0.150     | 0.150   | 1.128   | 0.003 | 0.311   |
| Bisoprolol_9                                      | 1   | 0.122     | 0.122   | 0.918   | 0.003 | 0.449   |
| Metoprolol_19                                     | 1   | 0.354     | 0.354   | 2.658   | 0.007 | 0.022   |
| Isosorbide.dinitrate_10                           | 1   | 0.215     | 0.215   | 1.613   | 0.004 | 0.129   |
| Acarbose_7                                        | 1   | 0.324     | 0.324   | 2.434   | 0.007 | 0.034   |
| Captopril.Tablets_6                               | 1   | 0.239     | 0.239   | 1.796   | 0.005 | 0.096   |
| Estazolam_6                                       | 1   | 0.275     | 0.275   | 2.066   | 0.006 | 0.062   |
| Nitroglycerin.Tablets_8                           | 1   | 0.206     | 0.206   | 1.551   | 0.004 | 0.144   |
| Potassium_chloride_32                             | 1   | 0.428     | 0.428   | 3.213   | 0.009 | 0.009   |
| Acvd                                              | 1   | 1.532     | 1.532   | 11.511  | 0.031 | 0.000   |
| Residuals                                         | 325 | 43.263    | 0.133   |         | 0.888 |         |
| Total                                             | 340 | 48.726    |         |         | 1.000 |         |

**Supplementary Table 2. Influence of drugs on the gut microbiome.** PERMANOVA was performed for each drug in relation to the relative abundances of gut microbial genes in each sample. Bray-Curtis distance, 999 permutations. The categories of the drugs are: A: Drugs for acid related disorders; D: Drugs used in diabetes; H: Drugs used in high blood pressure; L: Drugs for lipid modifying; P: Drugs used in Psycholeptics; S: Supplements; T: Antithrombotics drugs; V: Vasodilators used in cardiac diseases.

| Drug ID_Samples<br>number with the drug | Df | Sums<br>Of Sqs | MeanSqs | F.Model | R2     | P<br>value | Samples<br>number with<br>the drug | Drug<br>classification |
|-----------------------------------------|----|----------------|---------|---------|--------|------------|------------------------------------|------------------------|
| Clopidogrel Hydrogen<br>Sulphate_117    | 1  | 0.0002         | 0.0002  | 1.1966  | 0.0078 | 0.1240     | 117                                | T                      |
| Aspirin_33                              | 1  | 0.0002         | 0.0002  | 0.9434  | 0.0062 | 0.6050     | 33                                 | T                      |
| Atorvastatin_25                         | 1  | 0.0002         | 0.0002  | 1.2903  | 0.0084 | 0.0670     | 25                                 | L                      |
| Esomeprazole_9                          | 1  | 0.0001         | 0.0001  | 0.8310  | 0.0054 | 0.8420     | 9                                  | A                      |
| Isosorbide<br>Mononitrate_11            | 1  | 0.0002         | 0.0002  | 1.1197  | 0.0073 | 0.2170     | 11                                 | V                      |
| Potassium Citrate_14                    | 1  | 0.0002         | 0.0002  | 1.0647  | 0.0070 | 0.3110     | 14                                 | S                      |
| Perindopril_15                          | 1  | 0.0002         | 0.0002  | 1.1407  | 0.0074 | 0.1600     | 15                                 | H                      |
| Heparin Sodium_10                       | 1  | 0.0001         | 0.0001  | 0.8936  | 0.0058 | 0.7250     | 10                                 | T                      |
| Bisoprolol_9                            | 1  | 0.0001         | 0.0001  | 0.8893  | 0.0058 | 0.7460     | 9                                  | H                      |
| Fondaparinux                            | 1  | 0.0002         | 0.0002  | 1.4631  | 0.0095 | 0.0170     | 10                                 | T                      |

|                                |   |        |        |        |        |        |    |   |
|--------------------------------|---|--------|--------|--------|--------|--------|----|---|
| <b>Sodium_10</b>               |   |        |        |        |        |        |    |   |
| <b>Metoprolol_19</b>           | 1 | 0.0002 | 0.0002 | 1.3699 | 0.0089 | 0.0400 | 19 | H |
| <b>Insulin aspart_6</b>        | 1 | 0.0001 | 0.0001 | 0.8790 | 0.0057 | 0.7640 | 6  | D |
| <b>Isosorbide dinitrate_10</b> | 1 | 0.0002 | 0.0002 | 1.1369 | 0.0074 | 0.1750 | 10 | V |
| <b>Acarbose_7</b>              | 1 | 0.0002 | 0.0002 | 1.3913 | 0.0091 | 0.0330 | 7  | D |
| <b>Captopril_6</b>             | 1 | 0.0002 | 0.0002 | 0.9346 | 0.0061 | 0.5940 | 6  | H |
| <b>Estazolam_6</b>             | 1 | 0.0002 | 0.0002 | 1.0186 | 0.0067 | 0.3980 | 6  | P |
| <b>Nitroglycerin_8</b>         | 1 | 0.0002 | 0.0002 | 1.1029 | 0.0072 | 0.2570 | 8  | V |
| <b>Potassium Chloride_32</b>   | 1 | 0.0002 | 0.0002 | 1.1942 | 0.0078 | 0.1290 | 32 | S |

**Supplementary Table 3. Distinguishing CMDs using MLGs.** Prediction error according to the RFCV model in **Fig. 3a**.

|                       | <b>Predict Control</b> | <b>Predict Acvd</b> | <b>Predict Cirrhosis</b> | <b>Predict T2D</b> | <b>Predict Obesity</b> | <b>Error</b> |
|-----------------------|------------------------|---------------------|--------------------------|--------------------|------------------------|--------------|
| <b>True Control</b>   | 352                    | 62                  | 25                       | 74                 | 38                     | 0.361        |
| <b>True Acvd</b>      | 34                     | 156                 | 12                       | 11                 | 5                      | 0.284        |
| <b>True Cirrhosis</b> | 17                     | 2                   | 98                       | 3                  | 0                      | 0.183        |
| <b>True T2D</b>       | 38                     | 9                   | 7                        | 114                | 3                      | 0.333        |
| <b>True Obesity</b>   | 17                     | 10                  | 1                        | 4                  | 40                     | 0.444        |
